# Supplementary material for: Bioinformatic Tools for the Analysis and Prediction of ncRNA Interactions
Source: MDPI journal article supplement (doi:10.3390/ijms222111397), 2021-10-22
Supplement: s1 [file s1]

**Table S1.** ncRNA interactions resources. .

| Name               | Last update | Number interactions or data                         | Interaction or scope                                                 | Methodology                                                                                                                                      | URL                                                                                                                                                                                 |
|--------------------|-------------|-----------------------------------------------------|----------------------------------------------------------------------|--------------------------------------------------------------------------------------------------------------------------------------------------|-------------------------------------------------------------------------------------------------------------------------------------------------------------------------------------|
| DIANA-LncBase v3.0 | 2019        | 240.000                                             | miRNA-lncRNA                                                         | Reporter genes, northern blot, qPCR, RIP-qPCR, biotin miRNA tagging, CLIP-Seq, CLEAR-CLIP, CLIP-chimeric, miR-CLIP, AGO-IP, RNA-Seq, microarrays | <a href="http://carolina.imis.athena-innovation.gr/diana_tools/web/index.php?r=site%2Ftools">http://carolina.imis.athena-innovation.gr/diana_tools/web/index.php?r=site%2Ftools</a> |
| LnCeVar            | 2019        | 119.501 events                                      | Genomic variation in lncRNA                                          | PubMed data curated                                                                                                                              | <a href="http://www.biobigdata.net/LnCeVar/">http://www.biobigdata.net/LnCeVar/</a>                                                                                                 |
| LncTarD            | 2019        | 2.822                                               | lncRNA targets (miRNA,mRNA, and protein)                             | PubMed data curated                                                                                                                              | <a href="http://biocc.hrbmu.edu.cn/LncTarD/">http://biocc.hrbmu.edu.cn/LncTarD/</a> or <a href="http://biobigdata.hrbmu.edu.cn/LncTarD">http://biobigdata.hrbmu.edu.cn/LncTarD</a>  |
| MirGeneDB          | 2019        | 10.899                                              | miRNA genes                                                          | 400 publicly available small RNA sequencing datasets                                                                                             | <a href="http://mirgenedb.org/">http://mirgenedb.org/</a>                                                                                                                           |
| miRPathDB 2.0:     | 2019        | 27.452 miRNA candidates<br>1.978 miRNA interactions | miRNA-mRNA                                                           | miRBase (Version 22.1) and from miRCarta (Version 1.1) data                                                                                      | <a href="https://mpd.bioinf.uni-sb.de/">https://mpd.bioinf.uni-sb.de/</a>                                                                                                           |
| miRTarBase         | 2019        | 13.404 interactions                                 | ncRNA, mRNA, Transcription factors                                   | RNA-binding proteins (RBPs) and mRNAs from large-scale CLIP-Seq (HITS-CLIP, PAR-CLIP, iCLIP, CLASH) data                                         | <a href="http://miRTarBase.cuhk.edu.cn/">http://miRTarBase.cuhk.edu.cn/</a>                                                                                                         |
| SEAweb             | 2019        | 4200 published samples                              | miRNA, piRNA, snoRNA, snRNA, siRNA                                   | Text mining pipeline                                                                                                                             | <a href="http://sea.ims.bio/">http://sea.ims.bio/</a>                                                                                                                               |
| ENCORI (starBase)  | 2014?       | >10 millions                                        | miRNA-ncRNA, miRNA-mRNA, ncRNA-RNA, RNA-RNA, RBP-ncRNA, and RBP-mRNA | AGO CLIP Seq, Degradome-seq, RBP CLIP-Seq, RNA-RNA Interactome                                                                                   | <a href="http://starbase.sysu.edu.cn/index.php">http://starbase.sysu.edu.cn/index.php</a>                                                                                           |

|                                       |                            |                                        |                                                             |                                                                                    |                                                                                                                                                                            |
|---------------------------------------|----------------------------|----------------------------------------|-------------------------------------------------------------|------------------------------------------------------------------------------------|----------------------------------------------------------------------------------------------------------------------------------------------------------------------------|
| RAIN                                  | 2017<br>Junge et al (2017) | >10000                                 | Interactions by non-coding RNA (ncRNA)                      | ncRNA–RNA and ncRNA–protein                                                        | <a href="https://rth.dk/resources/rain/">https://rth.dk/resources/rain/</a>                                                                                                |
| <b>Databases and prediction tools</b> |                            |                                        |                                                             |                                                                                    |                                                                                                                                                                            |
| NPInter v4.0                          | 2019                       | 609.242 Interactions                   | ncRNA-ncRNA<br>ncRNA-DNA                                    | Manual literature mining, processing of high-throughput sequencing data.           | <a href="http://bigdata.ibp.ac.cn/npinter">http://bigdata.ibp.ac.cn/npinter</a>                                                                                            |
| oRNAMENT                              | 2019                       | 223 RBPs, 453 motifs                   | Putative RBP binding site in both coding and non-coding RNA | Position weight matrices (PWMs)                                                    | <a href="http://rnabiology.ircm.qc.ca/oRNAMENT/">http://rnabiology.ircm.qc.ca/oRNAMENT/</a>                                                                                |
| miRDB                                 | 2020                       | 3,5 millions                           | miRNA-target interactions                                   | CLIP-ligation data, Support vector machine (SVM) model                             | <a href="http://mirdb.org">http://mirdb.org</a> .                                                                                                                          |
| RNAInter (update of RAID)             | 2019                       | >41 million RNA-associated interaction | RNA-RNA and RNA-protein<br>RNA-DNA/compound                 | Experimentally validated and computationally predicted RNA-associated interactions | <a href="http://www.rna-society.org/rnainter/">http://www.rna-society.org/rnainter/</a> or <a href="http://www.rna-society.org/raid/">http://www.rna-society.org/raid/</a> |
